# Supplementary material
Source: PubMed Central journal article supplement (PMC5482929)
Supplement: NIHMS863885-supplement-1.pdf [file NIHMS863885-supplement-1.pdf]

**Supplementary Table S1: List of actionable genes and potential matched therapy**

| <b>Gene</b>                   | <b>Level</b> | <b>Potential Matched Therapy</b>                                          |
|-------------------------------|--------------|---------------------------------------------------------------------------|
| <i>AKT1</i>                   | 3            | AKT inhibitor                                                             |
| <i>ALK</i> fusion             | 1            | ALK inhibitor                                                             |
| <i>ARAF</i>                   | 3            | Sorafenib                                                                 |
| <i>BRAF</i> V600E             | 2A           | BRAF inhibitors                                                           |
| <i>BRCA1/2</i> loss           | 2B           | PARP Inhibitor therapy                                                    |
| <i>CD74-NRG</i>               | 4            | Anti-HER3 Monoclonal Antibody                                             |
| <i>CDK4</i> AMP               | 2B           | CDK 4/6 inhibitors                                                        |
| <i>CDKN2A</i> loss            | 4            | CDK4/6 inhibitors                                                         |
| <i>c-KIT</i>                  | 2B           | Imatinib                                                                  |
| <i>EGFR</i>                   | 1            | EGFR Tyrosine kinase inhibitors                                           |
| <i>ERBB2</i> mutation         | 3            | HER2 Tyrosine kinase inhibitors                                           |
| <i>ERBB2</i> Amplification    | 2B           | Pan-HER TKI e.g. Dacomitinib, anti-HER2 directed therapy e.g. Trastuzumab |
| <i>ERBB3</i>                  | 4            | ERBB3 kinase inhibitor, anti-HER3 monoclonal antibody                     |
| <i>FGFR1</i>                  | 3            | FGFR1 inhibitors                                                          |
| <i>FGFR2</i>                  | 3            | FGFR2 Inhibitors                                                          |
| <i>FGFR3</i>                  | 3            | FGFR3 inhibitors                                                          |
| <i>FGFR3-TACC3</i> fusion     | 3            | FGFR3 inhibitors                                                          |
| <i>GNAS</i>                   | 4            | MEK Inhibitors                                                            |
| <i>HRAS</i>                   | 4            | MEK Inhibitors                                                            |
| <i>KRAS</i>                   | 4            | MEK inhibitors                                                            |
| <i>MAP2K1</i>                 | 3            | MEK Inhibitors                                                            |
| <i>MDM2</i> Amplification     | 4            | MDM2 inhibitors                                                           |
| <i>MET</i> exon 14 alteration | 2B           | Cabozantinib, Crizotinib                                                  |
| <i>MET</i> Amplification      | 2B           | Cabozantinib, Crizotinib                                                  |
| <i>NF1</i> loss               | 4            | MEK Inhibitors                                                            |
| <i>NRAS</i>                   | 3            | MEK Inhibitors                                                            |
| <i>PIK3CA</i>                 | 3            | PI3K, Akt , mTOR inhibitors                                               |
| <i>PTEN</i> loss              | 4            | PI3K, Akt , mTOR inhibitors                                               |
| <i>RAF1</i>                   | 4            | Sorafenib                                                                 |
| <i>RET</i> fusion             | 2A           | RET inhibitors                                                            |
| <i>ROS1</i> fusion            | 1            | ROS1 inhibitors                                                           |
| <i>TSC1/TSC2</i> loss         | 2B           | mTOR inhibitors                                                           |

**Supplementary Table S2: List of cooccurring Level 1-4 mutations**

| Cooccurring             | Level 1                 | Level 2A           | Level 2B  | Level 3                    | Level 4                 | N=          |
|-------------------------|-------------------------|--------------------|-----------|----------------------------|-------------------------|-------------|
| <b>Level 1+2A</b>       | EGFR L747_P753delinsS   | MET AMP            | CDK4 AMP  |                            | CDKN2A loss             | 1           |
|                         | EGFR E746_A750del       | MET AMP            |           | PIK3CA E545K               |                         | 1           |
|                         | EGFR L858R              | MET AMP            |           |                            | CDKN2A loss<br>MDM2 AMP | 1           |
|                         | EGFR L858R              | MET AMP            |           |                            | CDKN2A loss             | 1           |
|                         | EGFR L858R              | MET AMP            |           |                            | BRAF D594V              | 1           |
|                         | EGFR L858R              | MET AMP            |           |                            | CDKN2A loss             | 1           |
|                         | EGFR L861Q              | MET AMP            |           |                            |                         | 1           |
| <b>Level 1+2B</b>       | EGFR E746_A750del       |                    | ERBB2 AMP |                            | MDM2 AMP                | 1           |
|                         | EGFR E746_A750del       |                    | ERBB2 AMP | NRASQ61K                   | CDKN2A loss             | 1           |
|                         | EGFR E746_A750del       |                    | ERBB2 AMP | PIK3CA E545K               |                         | 1           |
|                         | EGFR S752_I759del       |                    | ERBB2 AMP |                            |                         | 1           |
|                         | EGFR S752_I759del       |                    | ERBB2 AMP |                            | CDKN2A loss             | 1           |
|                         | EGFR L858R              |                    | ERBB2 AMP |                            |                         | 5           |
|                         | EGFR L858R              |                    | ERBB2 AMP | PIK3CA C420R               | MDM2 AMP                | 1           |
|                         | EGFR L747_A750delinsP   |                    | ERBB2 AMP |                            |                         | 1           |
|                         | EGFR L747_T751del       |                    | ERBB2 AMP |                            |                         | 1           |
|                         | EGFR                    |                    | ERBB2 AMP |                            |                         | 1           |
|                         | EGFR L747_P753delinsS   |                    | CDK4 AMP  |                            |                         | 1           |
|                         | EGFR E746_A750del       |                    | CDK4 AMP  | PIK3CA H1047R              | MDM2 AMP                | 1           |
|                         | EGFR E746_A750 deletion |                    | CDK4 AMP  |                            | MDM2 AMP                | 1           |
|                         | EGFR E746_A750del+T790M |                    | CDK4 AMP  |                            | MDM2 AMP                | 1           |
|                         | EGFR E746_A750delinsP   |                    | CDK4 AMP  |                            | MDM2 AMP, KRAS Q61R     | 1           |
|                         | EGFR L858R              |                    | CDK4 AMP  | PIK3CA H1047R              | MDM2 AMP                | 1           |
|                         | EGFR L858R              |                    | CDK4 AMP  |                            |                         | 4           |
|                         | EGFR L858R+T790M        |                    | CDK4 AMP  |                            |                         | 1           |
|                         | EGFR G719C+S768I        |                    | CDK4 AMP  |                            | MDM2 AMP                | 1           |
|                         | <b>Level 1+3</b>        | EGFR E709_T710 del |           |                            | PIK3CA E545K            | CDKN2A loss |
| EGFR E709_T710 del      |                         |                    |           | PIK3CA E542K               |                         | 1           |
| EGFR E709_T710 del      |                         |                    |           | PIK3CA H1047R              |                         | 1           |
| EGFR E746_A750del+T790M |                         |                    |           | PIK3CA E542K               |                         | 2           |
| EGFR E746_A750del+T790M |                         |                    |           | PIK3CA E545K               | CDKN2A loss             | 1           |
| EGFR E746_A750del       |                         |                    |           | PIK3CA H1047R              |                         | 1           |
| EGFR E746_A750del       |                         |                    |           | PIK3CA C420R,<br>FGFR1 AMP |                         | 1           |
| EGFR E746_A750del       |                         |                    |           | PIK3CA M1043I              |                         | 1           |
| EGFR E746_A750del       |                         |                    |           | PIK3CA N345K               |                         | 1           |
| EGFR E746_A750del       |                         |                    |           | PIK3CA E545K               | CDKN2A loss             | 1           |
| EGFR L747_A750delinsP   |                         |                    |           | PIK3CA N345H               |                         | 1           |
| EGFR L858R              |                         |                    |           | PIK3CA H1047L              |                         | 1           |

|                     |                        |                             |                          |                    |                        |   |
|---------------------|------------------------|-----------------------------|--------------------------|--------------------|------------------------|---|
|                     | EGFR L858R             |                             |                          | PIK3CA H1047R      |                        | 1 |
|                     | EGFR L858R             |                             |                          | PIK3CA E545K       |                        | 2 |
|                     | EGFR L858R             |                             |                          | PIK3CA N345Y       |                        | 1 |
|                     | EGFR S7681+G719C+T790M |                             |                          | PIK3CA E545K       |                        | 1 |
|                     | EGFR E709K+G719S       |                             |                          | PIK3CA E545K       |                        | 1 |
| <b>Level 2A+2B</b>  |                        |                             |                          |                    |                        |   |
|                     |                        | MET AMP                     | ERBB2 AMP                |                    |                        | 1 |
|                     |                        | MET AMP                     | BRCA1 loss               |                    |                        | 1 |
|                     |                        | MET exon 14 splice          | TSC2 loss                | PIK3CA E545K       |                        | 1 |
|                     |                        |                             | ERBB2 AMP, BRCA2 loss    | PIK3CA E545K       |                        | 1 |
|                     |                        | MET exon 14 splice          | CDK4 AMP                 |                    | MDM2 AMP               | 2 |
|                     |                        | MET exon 14 splice          | CDK4 AMP                 |                    | MDM2 AMP               | 4 |
|                     |                        | RET fusion, MET AMP         |                          |                    |                        |   |
| <b>Level 2A+3</b>   |                        |                             |                          |                    |                        |   |
|                     |                        | MET exon 14 splice          |                          | FGFR3-TACC3 fusion |                        | 1 |
|                     |                        | BRAF-V600E                  |                          | IDH1 R132C         |                        | 1 |
| <b>Level 2A+4</b>   |                        |                             |                          |                    |                        |   |
|                     |                        | RET fusion                  |                          |                    | CDKN2A loss            | 1 |
|                     |                        | MET exon 14 splice, MET AMP |                          |                    | MDM2 AMP               | 1 |
|                     |                        | MET exon 14 splice, MET AMP |                          |                    | NF1 loss, MDM2 AMP,    | 1 |
|                     |                        | MET exon 14 splice          |                          |                    | MDM2 AMP               | 1 |
|                     |                        | MET exon 14 splice          |                          |                    | NF1 loss, CDKN2A loss  | 1 |
|                     |                        | MET exon 14 splice          |                          |                    | CDKN2A loss            | 3 |
|                     |                        | MET AMP                     |                          |                    | NF1 loss               | 2 |
|                     |                        | MET AMP                     |                          |                    | CDKN2A loss            | 2 |
|                     |                        | MET AMP                     |                          |                    | BRAFG596C              | 1 |
|                     |                        | MET AMP                     |                          |                    | KRAS G12V              | 1 |
|                     |                        | BRAF V600E                  |                          |                    | CDKN2A loss            | 1 |
|                     |                        | BRAF V600E                  |                          |                    | PTEN loss              | 1 |
| <b>Level 2B + 3</b> |                        |                             |                          |                    |                        |   |
|                     |                        |                             | TSC1 loss                |                    | KRAS G12C              | 2 |
|                     |                        |                             | TSC1 loss                |                    | CDKN2A loss, KRAS G12C | 1 |
|                     |                        |                             | TSC2 loss                |                    | KRAS G12C              | 1 |
|                     |                        |                             | TSC2 loss                | PIK3CA AMP         |                        | 1 |
|                     |                        |                             | TSC2 loss                | PIK3CA E545K       |                        | 1 |
|                     |                        |                             | TSC2 loss<br>BRCA2 loss  |                    | CDKN2A loss            | 1 |
|                     |                        |                             | BRCA2 loss,<br>ERBB2 AMP | PIK3CA E545K       |                        | 1 |

|                     |  |          |                           |                              |                            |   |
|---------------------|--|----------|---------------------------|------------------------------|----------------------------|---|
|                     |  |          | CDK4 AMP                  | ERBB2 Y772_A775dup           |                            | 1 |
|                     |  |          | CDK4 AMP                  | ERBB2 V659E<br>PIK3CA E542K  | MDM2 AMP                   | 1 |
|                     |  |          | CDK4 AMP                  | ERBB2 S310F                  | MDM2 AMP                   | 1 |
|                     |  |          | ERBB2 AMP                 | ERBB2 Y772_A775dup           | CDKN2A loss                | 1 |
|                     |  |          | ERBB2 AMP                 | ERBB2 S310F                  |                            | 2 |
|                     |  |          | ERBB2 AMP                 | ERBB2 G776delinsVC           |                            | 1 |
|                     |  |          | ERBB2 AMP                 | ERBB2 Y772_A775dup           | CDKN2A loss                | 1 |
|                     |  |          | ERBB2 AMP                 | PIK3CA N345K                 |                            | 1 |
|                     |  |          |                           |                              |                            |   |
| <b>Level 2B + 4</b> |  |          | ERBB2 AMP                 |                              | CDKN2A loss                | 1 |
|                     |  |          | ERBB2 AMP                 |                              | PTEN loss, CDKN2A loss     | 1 |
|                     |  |          | TSC2 loss                 |                              | CDKN2A loss                | 1 |
|                     |  |          | TSC1 loss +<br>BRCA1 loss |                              | KRAS G12C, CDKN2A<br>loss  | 1 |
|                     |  |          | BRCA2 loss                |                              | PTEN loss                  | 1 |
|                     |  |          | BRCA2 loss                |                              | NF1 loss                   | 1 |
|                     |  |          | BRCA2 loss                |                              | KRAS G12A                  | 1 |
|                     |  |          | BRCA2 loss                |                              | KRAS G12A, CDKN2A<br>loss, | 1 |
|                     |  |          | BRCA1 loss                |                              | KRAS G12C                  | 1 |
|                     |  |          | CDK4 AMP                  |                              | NF1 loss                   | 1 |
|                     |  |          | CDK4 AMP                  |                              | BRAF D594N                 | 1 |
|                     |  |          | CDK4 AMP                  |                              | MDM2 AMP                   | 2 |
|                     |  | CDK4 AMP |                           | KRAS G12C                    | 1                          |   |
|                     |  |          |                           |                              |                            |   |
| <b>Level 3 + 4</b>  |  |          |                           | AKT1 E17K                    | KRAS G12A                  | 1 |
|                     |  |          |                           | PIK3CA M1043I                | KRAS G12A                  | 1 |
|                     |  |          |                           | PIK3CA E726K                 | KRAS G12C,                 | 1 |
|                     |  |          |                           | PIK3CA E542K                 | KRAS G12C,                 | 2 |
|                     |  |          |                           | PIK3CA E545K                 | KRAS G12C,                 | 2 |
|                     |  |          |                           | PIK3CA N345T                 | KRAS G12C,                 | 1 |
|                     |  |          |                           | FGFR1 AMP                    | KRAS G12C,                 | 1 |
|                     |  |          |                           | PIK3CA G1049R                | KRAS G12D                  | 1 |
|                     |  |          |                           | FGFR3 AMP                    | KRAS G12D,                 | 1 |
|                     |  |          |                           | PIK3CA E542K                 | KRAS G12V,                 | 1 |
|                     |  |          |                           | PIK3CA E542K                 | KRAS Q61H,                 | 1 |
|                     |  |          |                           | FGFR1 AMP                    | NF1 loss                   | 1 |
|                     |  |          |                           | FGFR1 AMP                    | CDKN2A loss                | 1 |
|                     |  |          |                           | MAP2K1 K57N,<br>PIK3CA N545Y | CDKN2A loss                | 1 |
|                     |  |          |                           | MAP2K1 E203K                 | PTEN loss                  | 1 |
|                     |  |          |                           | NRAS Q61R                    | BRAF K601E                 | 1 |
|                     |  |          |                           | NRAS Q61L                    | NF1 loss                   | 1 |
|                     |  |          |                           | NRAS Q61H                    | CDKN2A loss                | 1 |

|                     |                          |            |  |                      |                       |   |
|---------------------|--------------------------|------------|--|----------------------|-----------------------|---|
|                     |                          |            |  | ERBB2 Y772_A775dup   | MDM2 AMP              | 1 |
|                     |                          |            |  | ERBB2 Y772_A775dup   | CDKN2A loss           | 1 |
|                     |                          |            |  | ERBB2 Y772_A775dup   | CDKN2A loss           | 1 |
|                     |                          |            |  | FGFR2 AMP            | NF1 loss              | 1 |
|                     |                          |            |  | MAP2K1 E102_1103 del | CDKN2A loss           | 1 |
|                     |                          |            |  | PIK3CA E542K         | CDKN2A loss           | 1 |
|                     |                          |            |  | PIK3CA E545K         | BRAF G469A            | 1 |
|                     |                          |            |  | PIK3CA R93W          | PTEN loss             | 1 |
|                     |                          |            |  |                      |                       |   |
| <b>Level 1+4</b>    | EGFR L858R               |            |  |                      | MDM2 AMP, CDKN2A loss | 1 |
|                     | EGFR L858R               |            |  |                      | MDM2 AMP              | 1 |
|                     | EGFR L858R               |            |  |                      | CDK4, MDM2 AMP        | 4 |
|                     | EGFR L858R               |            |  |                      | KRAS Q61H+ Q22K       | 1 |
|                     | EGFR L858R               |            |  |                      | PTEN loss             | 1 |
|                     | EGFR L858R               |            |  |                      | CDKN2A loss           | 1 |
|                     | EGFR L858R+S768I         |            |  |                      | CDKN2A loss           | 1 |
|                     | EGFR L858R+T790M         |            |  |                      | CDKN2A loss           | 2 |
|                     | EGFR L858R+T790M         |            |  |                      | PTEN loss             | 1 |
|                     | EGFR L858R+T790M         |            |  |                      | PTEN, CDKN2A loss,    | 1 |
|                     | EGFR L858R+T790M         |            |  |                      | CDKN2A loss           | 1 |
|                     | EGFR L858R +E709K +T790M |            |  |                      | CDKN2A loss           | 1 |
|                     | EGFR E746_A750 deletion  |            |  |                      | PTEN loss             | 1 |
|                     | EGFR E746_A750 deletion  |            |  |                      | CDKN2A loss           | 5 |
|                     | EGFR E746_A750 deletion  |            |  |                      | PTEN loss             | 2 |
|                     | EGFR E746_A750del +T790M |            |  |                      | CDKN2A loss           | 2 |
|                     | EGFR E746_S752delinsV    |            |  |                      | CDKN2A loss           | 1 |
|                     | EGFR E746_T751delinsA    |            |  |                      | CDK4 AMP              | 1 |
|                     | EGFR L747_A750delinsP    |            |  |                      | CDKN2A loss, MDM2 AMP | 1 |
|                     | EGFR L747_T751           |            |  |                      | CDKN2A loss           | 1 |
|                     | EGFR L861Q + G719A       |            |  |                      | CDKN2A loss           | 1 |
|                     | EGFR G719A + T790M       |            |  |                      | CDKN2A loss           | 1 |
|                     | EGFR E709_T710 delinsD   |            |  |                      | CDKN2A loss           | 2 |
|                     | EGFR K745_E746insVPVAIK  |            |  |                      | CDKN2A loss           | 1 |
|                     | EGFR L861Q               |            |  |                      | CDKN2A loss           | 1 |
|                     | ROS1 fusion              |            |  |                      | CDKN2A loss           | 2 |
|                     | ROS1 fusion              |            |  |                      | CDKN2A loss           | 1 |
|                     | ALK fusion               |            |  |                      | CDKN2A loss, NF1 loss | 1 |
|                     | ALK fusion               |            |  |                      | CDKN2A loss           | 5 |
|                     | ALK fusion               |            |  |                      | MDM2 AMP              | 1 |
|                     |                          |            |  |                      |                       |   |
| <b>Level 2A + 4</b> |                          | RET fusion |  |                      | MDM2 AMP              | 1 |
|                     |                          | RET fusion |  |                      | CDKN2A loss           | 1 |
|                     |                          | RET fusion |  |                      | mTOR S2215F           | 1 |

| Level 4+4 |  |  |  |                                   | CDKN2A loss, MDM2 AMP               | 1 |
|-----------|--|--|--|-----------------------------------|-------------------------------------|---|
|           |  |  |  |                                   | CDKN2A loss MDM2 AMP                | 1 |
|           |  |  |  |                                   | KRAS G12A, PTEN loss                | 1 |
|           |  |  |  |                                   | KRAS G12A, MDM2 AMP                 | 1 |
|           |  |  |  |                                   | KRAS G12A, CDKN2A loss              | 2 |
|           |  |  |  |                                   | KRAS G12C, MDM2 AMP                 | 1 |
|           |  |  |  |                                   | KRAS G12C,CDKN2A loss               | 5 |
|           |  |  |  |                                   | KRAS G12C, mTOR S2215F              | 1 |
|           |  |  |  |                                   | KRAS G12C NF1 loss                  | 1 |
|           |  |  |  |                                   | KRAS G12D, BRAF G469A               | 1 |
|           |  |  |  |                                   | KRAS G12D,CDKN2A loss               | 1 |
|           |  |  |  |                                   | KRAS G12D, MDM2 AMP                 | 2 |
|           |  |  |  |                                   | KRAS G12D GNAS R201H                | 1 |
|           |  |  |  |                                   | KRAS G12R, CDKN2A loss              | 1 |
|           |  |  |  |                                   | KRAS G12V, NF1 loss                 | 2 |
|           |  |  |  |                                   | KRAS G12V, MDM2 AMP                 | 1 |
|           |  |  |  |                                   | KRAS G12V,CDKN2A loss               | 2 |
|           |  |  |  |                                   | KRAS G12V, BRAF D594Y, CDKN2A loss  | 1 |
|           |  |  |  |                                   | KRAS G13C, NF1 loss                 | 1 |
|           |  |  |  |                                   | KRAS G13C, BRAF G469A               | 1 |
|           |  |  |  |                                   | KRAS G13D,CDKN2A loss               | 2 |
|           |  |  |  |                                   | KRAS G13D, NF1 loss                 | 1 |
|           |  |  |  |                                   | KRAS Q61H,CDKN2A loss               | 2 |
|           |  |  |  |                                   | NF1 loss, CDKN2A loss               | 2 |
|           |  |  |  |                                   | NF1 loss, PTEN loss                 | 1 |
|           |  |  |  |                                   | NF1 loss, BRAF G466V                | 1 |
|           |  |  |  |                                   | NF1 loss, HRAS G13V                 | 1 |
|           |  |  |  |                                   | BRAF T599 duplication CDKN2A loss   | 1 |
|           |  |  |  |                                   | EGFR exon 20 insertion, CDKN2A loss | 3 |
|           |  |  |  |                                   | EGFR exon 20 insertion, MDM2 AMP    | 1 |
|           |  |  |  |                                   | GNAS Q227H, CDKN2A loss             | 1 |
|           |  |  |  |                                   | RAF1 S257L, NF1 loss                | 1 |
|           |  |  |  |                                   | RAF1 S257L, MDM2 AMP                | 1 |
|           |  |  |  |                                   | PTEN Loss, NF1 loss                 | 1 |
|           |  |  |  | PTEN loss, CDKN2A loss            | 1                                   |   |
|           |  |  |  | PTEN loss, EGFR Exon 20 insertion | 1                                   |   |
|           |  |  |  | mTOR S2215F, CDKN2A loss          | 1                                   |   |

**Supplementary Table S3: EGFR mutations identified and associated therapy**

| <b>EGFR Mutations</b>    | <b>No. of pts</b> | <b>EGFR TKI</b> | <b>Clinical Benefit</b> | <b>Chemotherapy</b> | <b>Immunotherapy</b> |
|--------------------------|-------------------|-----------------|-------------------------|---------------------|----------------------|
| <b>Exon 21</b>           |                   |                 |                         |                     |                      |
| L858R                    | 48                | 44              | 34 <sup>^</sup>         | 30                  | 4                    |
| L861Q                    | 5                 | 5               | 2                       | 3                   | 3                    |
| <b>Exon 19 deletion</b>  |                   |                 |                         |                     |                      |
| E746_A750del             | 56                | 53              | 48**                    | 29                  | 3                    |
| E746_S752delinsV         | 7                 | 7               | 7                       | 2                   | 0                    |
| E746_T751delinsP         | 1                 | 1               | 1                       | 1                   | 0                    |
| E746_T751delinsVA        | 1                 | 1               | 1                       | 0                   | 0                    |
| L747_P753delinsS         | 7                 | 7               | 6*                      | 3                   | 1                    |
| L747_E749del             | 1                 | 4               | 1                       | 1                   | 0                    |
| L747_T751del             | 4                 | 3               | 3                       | 1                   | 0                    |
| L747P                    | 3                 | 5               | 2                       | 3                   | 1                    |
| L747_A750delinsP         | 5                 | 2               | 5                       | 3                   | 2                    |
| S752_I759del             | 2                 | 1               | 1                       | 1                   | 0                    |
| L747_S752del             | 1                 | 1               | 1                       | 0                   | 0                    |
| <b>Exon 19 Insertion</b> |                   |                 |                         |                     |                      |
| K745_E746insVPAIK        | 1                 |                 | 1                       | 1                   | 1                    |
| <b>T790M Mutated</b>     |                   |                 |                         |                     |                      |
| T790M+E746_A750del       | 23                | 23              | 23                      | 12                  | 4                    |
| T790M+E746_T751delinsA   | 2                 | 2               | 2                       | 1                   | 0                    |
| T790M+L858R              | 11                | 11              | 9                       | 6                   | 0                    |
| T790M+L861Q              | 1                 | 1               | 1                       | 1                   | 0                    |
| T790M+L747_P753delinsS   | 1                 | 1               | 1                       | 1                   | 1                    |
| T790M+L858R+D761Y        | 1                 | 1               | 1                       | 1                   | 0                    |
| T790M+L858R+E709K+G5A    | 1                 | 1               | 1                       | 1                   | 1                    |
| T790M+L858R+T854S        | 1                 | 1               | 1                       | 1                   | 0                    |
| T790M+L747_A750delinsP   | 2                 | 2               | 2                       | 2                   | 0                    |
| T790M+S752_I759del+A750P | 1                 | 1               | 1                       | 1                   | 1                    |
| T790M+G719C+S768I+C775Y  | 1                 | 1               | 1                       | 1                   | 0                    |
| T790M+G719A+L707W        | 1                 | 1               | 1                       | 1                   | 1                    |

|                                |   |   |   |   |   |
|--------------------------------|---|---|---|---|---|
| T790M+E746_T751delinsVP        | 1 | 1 | 1 | 0 | 0 |
| <b>Total</b>                   |   |   |   |   |   |
| <b>Co-occurring Mutations:</b> |   |   |   |   |   |
| L858R+E709K                    | 3 | 3 | 3 | 3 | 0 |
| L858R+S768I                    | 1 | 1 | 0 | 0 | 0 |
| L858R+L833V                    | 1 | 1 | 1 | 1 | 0 |
| L858R+MD277IY                  | 1 | 1 | 1 | 1 | 0 |
| L858R+G221V                    | 1 | 1 | 0 | 1 | 0 |
| L858R+H870R+S306L              | 1 | 1 | 1 | 1 | 1 |
| L858R+V689M                    | 1 | 1 | 0 | 1 | 0 |
| L858R+D761Y                    | 1 | 1 | 1 | 1 | 0 |
| L858R+T854S                    | 1 | 1 | 1 | 1 | 0 |
| L858R+D1014V                   | 1 | 1 | 1 | 1 | 0 |
| L858R+K860I+K867T              | 1 | 1 | 1 | 0 | 0 |
| L858R+L62R                     | 1 | 1 | 1 | 1 | 0 |
| L858R+V834L                    | 1 | 1 | 1 | 1 | 0 |
| E709K+G719S                    | 2 | 1 | 1 | 2 | 0 |
| E709K+G719A                    | 1 | 1 | 0 | 1 | 0 |
| E709A+G719S                    | 1 | 1 | 1 | 1 | 0 |
| G719C+S768I                    | 1 | 1 | 1 | 1 | 0 |
| G719S+S768I                    | 1 | 1 | 1 | 0 | 0 |
| G719A+L861Q                    | 1 | 1 | 1 | 1 | 0 |
| T751_A755del+L747P             | 1 | 1 | 1 | 1 | 0 |
| L747_P753delinsS+A755G         | 1 | 1 | 0 | 1 | 0 |
| L861Q+S720F                    | 1 | 1 | 0 | 1 | 0 |
| <b>Exon 18</b>                 |   |   |   |   |   |
| E709_T710delinsD               | 6 | 5 | 2 | 4 | 2 |
| G719A                          | 3 | 3 | 1 | 0 | 0 |
| L858R+E746_A750del             | 1 | 1 | 1 | 1 | 0 |
| <b>EGFR-KDD</b>                | 2 | 2 | 2 | 2 | 1 |
| <b>Unknown significance</b>    |   |   |   |   |   |
| V765L                          | 1 | 0 | 0 | 1 | 1 |
| G779F                          | 1 | 0 | 0 | 1 | 0 |



| <b>Exon 20 Insertions</b> |   |   |   |   |   |
|---------------------------|---|---|---|---|---|
| K766delinsNGQR            | 1 | 0 | 0 | 0 | 0 |
| N771_H773dup              | 2 | 0 | 0 | 2 | 0 |
| H773_V774insH             | 1 | 0 | 0 | 1 | 0 |
| P772_H773dup              | 1 | 0 | 0 | 1 | 1 |
| H773dup                   | 1 | 0 | 0 | 1 | 1 |
| N771delinSTH              | 1 | 0 | 0 | 1 | 0 |
| V769_D770insGGTR          | 1 | 0 | 0 | 1 | 1 |
| N771_P772insV             | 2 | 0 | 0 | 2 | 0 |
| A767_V769dup              | 2 | 0 | 0 | 2 | 1 |
| S7678_D770dup             | 1 | 0 | 0 | 1 | 1 |
| K766_N771insQPP           | 1 | 1 | 0 | 1 | 0 |
| D770_N771insQPP           | 1 | 0 | 0 | 1 | 1 |
| D770_N771insG             | 1 | 0 | 0 | 1 | 0 |
| N771_P772insH             | 1 | 0 | 0 | 1 | 0 |
| <b>Exon 20 Missense</b>   |   |   |   |   |   |
| H773R                     | 1 | 1 | 1 | 1 | 0 |

**L858R:** ^ 3 patients await imaging

**Exon 19 deletion:** \*\* 3 patients await imaging

**L747\_P753delinsS** ^ 1 patient awaits imaging

**Supplementary Table S4: List of 410 genes in MSK-IMPACT assay**

| <b>Approved Symbol</b> | <b>Approved Name</b>                                                    |
|------------------------|-------------------------------------------------------------------------|
| <i>ABL1</i>            | c-abl oncogene 1, non-receptor tyrosine kinase                          |
| <i>ACVR1</i>           | activin A receptor, type I                                              |
| <i>AKT1</i>            | v-akt murine thymoma viral oncogene homolog 1                           |
| <i>AKT2</i>            | v-akt murine thymoma viral oncogene homolog 2                           |
| <i>AKT3</i>            | v-akt murine thymoma viral oncogene homolog 3 (protein kinase B, gamma) |
| <i>ALK</i>             | anaplastic lymphoma receptor tyrosine kinase                            |
| <i>ALOX12B</i>         | arachidonate 12-lipoxygenase, 12R type                                  |
| <i>ANKRD11</i>         | ankyrin repeat domain 11                                                |
| <i>APC</i>             | adenomatous polyposis coli                                              |
| <i>AR</i>              | androgen receptor                                                       |
| <i>ARAF</i>            | v-raf murine sarcoma 3611 viral oncogene homolog                        |
| <i>ARID1A</i>          | AT rich interactive domain 1A (SWI-like)                                |
| <i>ARID1B</i>          | AT rich interactive domain 1B (SWI1-like)                               |
| <i>ARID2</i>           | AT rich interactive domain 2 (ARID, RFX-like)                           |
| <i>ARID5B</i>          | AT rich interactive domain 5B (MRF1-like)                               |
| <i>ASXL1</i>           | additional sex combs like 1 (Drosophila)                                |
| <i>ASXL2</i>           | additional sex combs like 2 (Drosophila)                                |
| <i>ATM</i>             | ataxia telangiectasia mutated                                           |
| <i>ATR</i>             | ataxia telangiectasia and Rad3 related                                  |
| <i>ATRX</i>            | alpha thalassemia/mental retardation syndrome X-linked                  |
| <i>AURKA</i>           | aurora kinase A                                                         |
| <i>AURKB</i>           | aurora kinase B                                                         |
| <i>AXIN1</i>           | axin 1                                                                  |
| <i>AXIN2</i>           | axin 2                                                                  |
| <i>AXL</i>             | AXL receptor tyrosine kinase                                            |
| <i>B2M</i>             | beta-2-microglobulin                                                    |
| <i>BAP1</i>            | BRCA1 associated protein-1 (ubiquitin carboxy-terminal hydrolase)       |
| <i>BARD1</i>           | BRCA1 associated RING domain 1                                          |
| <i>BBC3</i>            | BCL2 binding component 3                                                |
| <i>BCL10</i>           | B-cell CLL/lymphoma 10                                                  |
| <i>BCL2</i>            | B-cell CLL/lymphoma 2                                                   |
| <i>BCL2L1</i>          | BCL2-like 1                                                             |
| <i>BCL2L11</i>         | BCL2-like 11 (apoptosis facilitator)                                    |
| <i>BCL6</i>            | B-cell CLL/lymphoma 6                                                   |
| <i>BCOR</i>            | BCL6 corepressor                                                        |
| <i>BIRC3</i>           | baculoviral IAP repeat-containing 3                                     |

|               |                                                                                                    |
|---------------|----------------------------------------------------------------------------------------------------|
| <i>BLM</i>    | Bloom syndrome, RecQ helicase-like                                                                 |
| <i>BMPRIA</i> | bone morphogenetic protein receptor, type IA                                                       |
| <i>BRAF</i>   | v-raf murine sarcoma viral oncogene homolog B1                                                     |
| <i>BRCA1</i>  | breast cancer 1, early onset                                                                       |
| <i>BRCA2</i>  | breast cancer 2, early onset                                                                       |
| <i>BRD4</i>   | bromodomain containing 4                                                                           |
| <i>BRIP1</i>  | BRCA1 interacting protein C-terminal helicase 1                                                    |
| <i>BTK</i>    | Bruton agammaglobulinemia tyrosine kinase                                                          |
| <i>CALR</i>   | calreticulin                                                                                       |
| <i>CARD11</i> | caspase recruitment domain family, member 11                                                       |
| <i>CASP8</i>  | caspase 8, apoptosis-related cysteine peptidase                                                    |
| <i>CBFB</i>   | core-binding factor, beta subunit                                                                  |
| <i>CBL</i>    | Cas-Br-M (murine) ecotropic retroviral transforming sequence                                       |
| <i>CCND1</i>  | cyclin D1                                                                                          |
| <i>CCND2</i>  | cyclin D2                                                                                          |
| <i>CCND3</i>  | cyclin D3                                                                                          |
| <i>CCNE1</i>  | cyclin E1                                                                                          |
| <i>CD274</i>  | CD274 molecule                                                                                     |
| <i>CD276</i>  | CD276 molecule                                                                                     |
| <i>CD79A</i>  | CD79a molecule, immunoglobulin-associated alpha                                                    |
| <i>CD79B</i>  | CD79b molecule, immunoglobulin-associated beta                                                     |
| <i>CDC73</i>  | cell division cycle 73, Paf1/RNA polymerase II complex component, homolog ( <i>S. cerevisiae</i> ) |
| <i>CDH1</i>   | cadherin 1, type 1, E-cadherin (epithelial)                                                        |
| <i>CDK12</i>  | cyclin-dependent kinase 12                                                                         |
| <i>CDK4</i>   | cyclin-dependent kinase 4                                                                          |
| <i>CDK6</i>   | cyclin-dependent kinase 6                                                                          |
| <i>CDK8</i>   | cyclin-dependent kinase 8                                                                          |
| <i>CDKN1A</i> | cyclin-dependent kinase inhibitor 1A (p21, Cip1)                                                   |
| <i>CDKN1B</i> | cyclin-dependent kinase inhibitor 1B (p27, Kip1)                                                   |
| <i>CDKN2A</i> | cyclin-dependent kinase inhibitor 2A (melanoma, p16, inhibits CDK4)                                |
| <i>CDKN2B</i> | cyclin-dependent kinase inhibitor 2B (p15, inhibits CDK4)                                          |
| <i>CDKN2C</i> | cyclin-dependent kinase inhibitor 2C (p18, inhibits CDK4)                                          |
| <i>CEBPA</i>  | CCAAT/enhancer binding protein (C/EBP), alpha                                                      |
| <i>CENPA</i>  | centromere protein A                                                                               |
| <i>CHEK1</i>  | CHK1 checkpoint homolog ( <i>S. pombe</i> )                                                        |
| <i>CHEK2</i>  | CHK2 checkpoint homolog ( <i>S. pombe</i> )                                                        |
| <i>CIC</i>    | capicua homolog ( <i>Drosophila</i> )                                                              |
| <i>CREBBP</i> | CREB binding protein                                                                               |
| <i>CRKL</i>   | v-crk sarcoma virus CT10 oncogene homolog (avian)-like                                             |

|                |                                                                                                                                     |
|----------------|-------------------------------------------------------------------------------------------------------------------------------------|
| <i>CRLF2</i>   | cytokine receptor-like factor 2                                                                                                     |
| <i>CSF1R</i>   | colony stimulating factor 1 receptor                                                                                                |
| <i>CSF3R</i>   | colony stimulating factor 3 receptor (granulocyte)                                                                                  |
| <i>CTCF</i>    | CCCTC-binding factor (zinc finger protein)                                                                                          |
| <i>CTLA4</i>   | cytotoxic T-lymphocyte-associated protein 4                                                                                         |
| <i>CTNNB1</i>  | catenin (cadherin-associated protein), beta 1, 88kDa                                                                                |
| <i>CUL3</i>    | cullin 3                                                                                                                            |
| <i>CXCR4</i>   | chemokine (C-X-C motif) receptor 4                                                                                                  |
| <i>DAXX</i>    | death-domain associated protein                                                                                                     |
| <i>DCUNID1</i> | DCN1, defective in cullin neddylation 1, domain containing 1 ( <i>S. cerevisiae</i> )                                               |
| <i>DDR2</i>    | discoidin domain receptor tyrosine kinase 2                                                                                         |
| <i>DICER1</i>  | dicer 1, ribonuclease type III                                                                                                      |
| <i>DIS3</i>    | DIS3 mitotic control homolog ( <i>S. cerevisiae</i> )                                                                               |
| <i>DNAJB1</i>  | DnaJ (Hsp40) homolog, subfamily B, member 1                                                                                         |
| <i>DNMT1</i>   | DNA (cytosine-5-)-methyltransferase 1                                                                                               |
| <i>DNMT3A</i>  | DNA (cytosine-5-)-methyltransferase 3 alpha                                                                                         |
| <i>DNMT3B</i>  | DNA (cytosine-5-)-methyltransferase 3 beta                                                                                          |
| <i>DOT1L</i>   | DOT1-like, histone H3 methyltransferase ( <i>S. cerevisiae</i> )                                                                    |
| <i>E2F3</i>    | E2F transcription factor 3                                                                                                          |
| <i>EED</i>     | embryonic ectoderm development                                                                                                      |
| <i>EGFL7</i>   | EGF-like-domain, multiple 7                                                                                                         |
| <i>EGFR</i>    | epidermal growth factor receptor                                                                                                    |
| <i>EIF1AX</i>  | eukaryotic translation initiation factor 1A, X-linked                                                                               |
| <i>EIF4A2</i>  | eukaryotic translation initiation factor 4A2                                                                                        |
| <i>EIF4E</i>   | eukaryotic translation initiation factor 4E                                                                                         |
| <i>EP300</i>   | E1A binding protein p300                                                                                                            |
| <i>EPCAM</i>   | epithelial cell adhesion molecule                                                                                                   |
| <i>EPHA3</i>   | EPH receptor A3                                                                                                                     |
| <i>EPHA5</i>   | EPH receptor A5                                                                                                                     |
| <i>EPHA7</i>   | EPH receptor A7                                                                                                                     |
| <i>EPHB1</i>   | EPH receptor B1                                                                                                                     |
| <i>ERBB2</i>   | v-erb-b2 erythroblastic leukemia viral oncogene homolog 2, neuro/glioblastoma derived oncogene homolog (avian)                      |
| <i>ERBB3</i>   | v-erb-b2 erythroblastic leukemia viral oncogene homolog 3 (avian)                                                                   |
| <i>ERBB4</i>   | v-erb-a erythroblastic leukemia viral oncogene homolog 4 (avian)                                                                    |
| <i>ERCC2</i>   | excision repair cross-complementing rodent repair deficiency, complementation group 2                                               |
| <i>ERCC3</i>   | excision repair cross-complementing rodent repair deficiency, complementation group 3 (xeroderma pigmentosum group B complementing) |
| <i>ERCC4</i>   | excision repair cross-complementing rodent repair deficiency, complementation group 4                                               |
| <i>ERCC5</i>   | excision repair cross-complementing rodent repair deficiency, complementation group 5                                               |

|                |                                                                                                          |
|----------------|----------------------------------------------------------------------------------------------------------|
| <i>ERG</i>     | v-ets erythroblastosis virus E26 oncogene homolog (avian)                                                |
| <i>ERRF11</i>  | ERBB receptor feedback inhibitor 1                                                                       |
| <i>ESR1</i>    | estrogen receptor 1                                                                                      |
| <i>ETV1</i>    | ets variant 1                                                                                            |
| <i>ETV6</i>    | ets variant 6                                                                                            |
| <i>EZH2</i>    | enhancer of zeste homolog 2 (Drosophila)                                                                 |
| <i>FAM123B</i> | family with sequence similarity 123B                                                                     |
| <i>FAM175A</i> | family with sequence similarity 175, member A                                                            |
| <i>FAM46C</i>  | family with sequence similarity 46, member C                                                             |
| <i>FANCA</i>   | Fanconi anemia, complementation group A                                                                  |
| <i>FANCC</i>   | Fanconi anemia, complementation group C                                                                  |
| <i>FAT1</i>    | FAT tumor suppressor homolog 1 (Drosophila)                                                              |
| <i>FBXW7</i>   | F-box and WD repeat domain containing 7                                                                  |
| <i>FGF19</i>   | fibroblast growth factor 19                                                                              |
| <i>FGF3</i>    | fibroblast growth factor 3                                                                               |
| <i>FGF4</i>    | fibroblast growth factor 4                                                                               |
| <i>FGFR1</i>   | fibroblast growth factor receptor 1                                                                      |
| <i>FGFR2</i>   | fibroblast growth factor receptor 2                                                                      |
| <i>FGFR3</i>   | fibroblast growth factor receptor 3                                                                      |
| <i>FGFR4</i>   | fibroblast growth factor receptor 4                                                                      |
| <i>FH</i>      | fumarate hydratase                                                                                       |
| <i>FLCN</i>    | folliculin                                                                                               |
| <i>FLT1</i>    | fms-related tyrosine kinase 1 (vascular endothelial growth factor/vascular permeability factor receptor) |
| <i>FLT3</i>    | fms-related tyrosine kinase 3                                                                            |
| <i>FLT4</i>    | fms-related tyrosine kinase 4                                                                            |
| <i>FOXA1</i>   | forkhead box A1                                                                                          |
| <i>FOXL2</i>   | forkhead box L2                                                                                          |
| <i>FOXO1</i>   | forkhead box O1                                                                                          |
| <i>FOXP1</i>   | forkhead box P1                                                                                          |
| <i>FUBP1</i>   | far upstream element (FUSE) binding protein 1                                                            |
| <i>FYN</i>     | FYN oncogene related to SRC, FGR, YES                                                                    |
| <i>GATA1</i>   | GATA binding protein 1 (globin transcription factor 1)                                                   |
| <i>GATA2</i>   | GATA binding protein 2                                                                                   |
| <i>GATA3</i>   | GATA binding protein 3                                                                                   |
| <i>GLI1</i>    | GLI family zinc finger 1                                                                                 |
| <i>GNA11</i>   | guanine nucleotide binding protein (G protein), alpha 11 (Gq class)                                      |
| <i>GNAQ</i>    | guanine nucleotide binding protein (G protein), q polypeptide                                            |
| <i>GNAS</i>    | GNAS complex locus                                                                                       |
| <i>GPS2</i>    | G protein pathway suppressor 2                                                                           |

|                       |                                                                               |
|-----------------------|-------------------------------------------------------------------------------|
| <i>GREM1</i>          | gremlin 1                                                                     |
| <i>GRIN2A</i>         | glutamate receptor, ionotropic, N-methyl D-aspartate 2A                       |
| <i>GSK3B</i>          | glycogen synthase kinase 3 beta                                               |
| <i>H3F3A</i>          | H3 histone, family 3A                                                         |
| <i>H3F3B</i>          | H3 histone, family 3B (H3.3B)                                                 |
| <i>H3F3C</i>          | H3 histone, family 3C                                                         |
| <i>HGF</i>            | hepatocyte growth factor (hepapoietin A; scatter factor)                      |
| <i>HIST1H1C</i>       | histone cluster 1, H1c                                                        |
| <i>HIST1H2B<br/>D</i> | histone cluster 1, H2bd                                                       |
| <i>HIST1H3A</i>       | histone cluster 1, H3a                                                        |
| <i>HIST1H3B</i>       | histone cluster 1, H3b                                                        |
| <i>HIST1H3C</i>       | histone cluster 1, H3c                                                        |
| <i>HIST1H3D</i>       | histone cluster 1, H3d                                                        |
| <i>HIST1H3E</i>       | histone cluster 1, H3e                                                        |
| <i>HIST1H3F</i>       | histone cluster 1, H3f                                                        |
| <i>HIST1H3G</i>       | histone cluster 1, H3g                                                        |
| <i>HIST1H3H</i>       | histone cluster 1, H3h                                                        |
| <i>HIST1H3I</i>       | histone cluster 1, H3i                                                        |
| <i>HIST1H3J</i>       | histone cluster 1, H3j                                                        |
| <i>HIST2H3C</i>       | histone cluster 2, H3c                                                        |
| <i>HIST2H3D</i>       | histone cluster 2, H3d                                                        |
| <i>HIST3H3</i>        | histone cluster 3, H3                                                         |
| <i>HLA-A</i>          | major histocompatibility complex, class I, A                                  |
| <i>HNF1A</i>          | HNF1 homeobox A                                                               |
| <i>HOXB13</i>         | homeobox B13                                                                  |
| <i>HRAS</i>           | v-Ha-ras Harvey rat sarcoma viral oncogene homolog                            |
| <i>ICOSLG</i>         | inducible T-cell co-stimulator ligand                                         |
| <i>ID3</i>            | inhibitor of DNA binding 3, dominant negative helix-loop-helix protein        |
| <i>IDH1</i>           | isocitrate dehydrogenase 1 (NADP+), soluble                                   |
| <i>IDH2</i>           | isocitrate dehydrogenase 2 (NADP+), mitochondrial                             |
| <i>IFNGR1</i>         | interferon gamma receptor 1                                                   |
| <i>IGF1</i>           | insulin-like growth factor 1 (somatomedin C)                                  |
| <i>IGF1R</i>          | insulin-like growth factor 1 receptor                                         |
| <i>IGF2</i>           | insulin-like growth factor 2 (somatomedin A)                                  |
| <i>IKBKE</i>          | inhibitor of kappa light polypeptide gene enhancer in B-cells, kinase epsilon |
| <i>IKZF1</i>          | IKAROS family zinc finger 1 (Ikaros)                                          |
| <i>IL10</i>           | interleukin 10                                                                |
| <i>IL7R</i>           | interleukin 7 receptor                                                        |
| <i>INHHA</i>          | inhibin, alpha                                                                |

|                |                                                                     |
|----------------|---------------------------------------------------------------------|
| <i>INHBA</i>   | inhibin, beta A                                                     |
| <i>INPP4A</i>  | inositol polyphosphate-4-phosphatase, type I, 107kDa                |
| <i>INPP4B</i>  | inositol polyphosphate-4-phosphatase, type II, 105kDa               |
| <i>INSR</i>    | insulin receptor                                                    |
| <i>IRF4</i>    | interferon regulatory factor 4                                      |
| <i>IRS1</i>    | insulin receptor substrate 1                                        |
| <i>IRS2</i>    | insulin receptor substrate 2                                        |
| <i>JAK1</i>    | Janus kinase 1                                                      |
| <i>JAK2</i>    | Janus kinase 2                                                      |
| <i>JAK3</i>    | Janus kinase 3                                                      |
| <i>JUN</i>     | jun proto-oncogene                                                  |
| <i>KDM5A</i>   | lysine (K)-specific demethylase 5A                                  |
| <i>KDM5C</i>   | lysine (K)-specific demethylase 5C                                  |
| <i>KDM6A</i>   | lysine (K)-specific demethylase 6A                                  |
| <i>KDR</i>     | kinase insert domain receptor (a type III receptor tyrosine kinase) |
| <i>KEAP1</i>   | kelch-like ECH-associated protein 1                                 |
| <i>KIT</i>     | v-kit Hardy-Zuckerman 4 feline sarcoma viral oncogene homolog       |
| <i>KLF4</i>    | Kruppel-like factor 4 (gut)                                         |
| <i>KRAS</i>    | v-Ki-ras2 Kirsten rat sarcoma viral oncogene homolog                |
| <i>LATS1</i>   | LATS, large tumor suppressor, homolog 1 (Drosophila)                |
| <i>LATS2</i>   | LATS, large tumor suppressor, homolog 2 (Drosophila)                |
| <i>LMO1</i>    | LIM domain only 1 (rhombotin 1)                                     |
| <i>MALT1</i>   | mucosa associated lymphoid tissue lymphoma translocation gene 1     |
| <i>MAP2K1</i>  | mitogen-activated protein kinase kinase 1                           |
| <i>MAP2K2</i>  | mitogen-activated protein kinase kinase 2                           |
| <i>MAP2K4</i>  | mitogen-activated protein kinase kinase 4                           |
| <i>MAP3K1</i>  | mitogen-activated protein kinase kinase kinase 1                    |
| <i>MAP3K13</i> | mitogen-activated protein kinase kinase kinase 13                   |
| <i>MAP3K14</i> | mitogen-activated protein kinase kinase kinase 14                   |
| <i>MAPK1</i>   | mitogen-activated protein kinase 1                                  |
| <i>MAPK3</i>   | mitogen-activated protein kinase 3                                  |
| <i>MAX</i>     | MYC associated factor X                                             |
| <i>MCL1</i>    | myeloid cell leukemia sequence 1 (BCL2-related)                     |
| <i>MDC1</i>    | mediator of DNA-damage checkpoint 1                                 |
| <i>MDM2</i>    | Mdm2 p53 binding protein homolog (mouse)                            |
| <i>MDM4</i>    | Mdm4 p53 binding protein homolog (mouse)                            |
| <i>MED12</i>   | mediator complex subunit 12                                         |
| <i>MEF2B</i>   | myocyte enhancer factor 2B                                          |
| <i>MEN1</i>    | multiple endocrine neoplasia I                                      |

|               |                                                                                     |
|---------------|-------------------------------------------------------------------------------------|
| <i>MET</i>    | met proto-oncogene (hepatocyte growth factor receptor)                              |
| <i>MGA</i>    | MAX gene associated                                                                 |
| <i>MITF</i>   | microphthalmia-associated transcription factor                                      |
| <i>MLH1</i>   | mutL homolog 1, colon cancer, nonpolyposis type 2 (E. coli)                         |
| <i>MLL</i>    | myeloid/lymphoid or mixed-lineage leukemia (trithorax homolog, Drosophila)          |
| <i>MLL2</i>   | myeloid/lymphoid or mixed-lineage leukemia 2                                        |
| <i>MLL3</i>   | myeloid/lymphoid or mixed-lineage leukemia 3                                        |
| <i>MPL</i>    | myeloproliferative leukemia virus oncogene                                          |
| <i>MRE11A</i> | MRE11 meiotic recombination 11 homolog A (S. cerevisiae)                            |
| <i>MSH2</i>   | mutS homolog 2, colon cancer, nonpolyposis type 1 (E. coli)                         |
| <i>MSH6</i>   | mutS homolog 6 (E. coli)                                                            |
| <i>MST1</i>   | macrophage stimulating 1 (hepatocyte growth factor-like)                            |
| <i>MST1R</i>  | macrophage stimulating 1 receptor (c-met-related tyrosine kinase)                   |
| <i>MTOR</i>   | mechanistic target of rapamycin (serine/threonine kinase)                           |
| <i>MUTYH</i>  | mutY homolog (E. coli)                                                              |
| <i>MYC</i>    | v-myc myelocytomatosis viral oncogene homolog (avian)                               |
| <i>MYCL1</i>  | v-myc myelocytomatosis viral oncogene homolog 1, lung carcinoma derived (avian)     |
| <i>MYCN</i>   | v-myc myelocytomatosis viral related oncogene, neuroblastoma derived (avian)        |
| <i>MYD88</i>  | myeloid differentiation primary response gene (88)                                  |
| <i>MYOD1</i>  | myogenic differentiation 1                                                          |
| <i>NBN</i>    | nibrin                                                                              |
| <i>NCOA3</i>  | nuclear receptor coactivator 3                                                      |
| <i>NCOR1</i>  | nuclear receptor corepressor 1                                                      |
| <i>NEGR1</i>  | neuronal growth regulator 1                                                         |
| <i>NF1</i>    | neurofibromin 1                                                                     |
| <i>NF2</i>    | neurofibromin 2 (merlin)                                                            |
| <i>NFE2L2</i> | nuclear factor (erythroid-derived 2)-like 2                                         |
| <i>NFKBIA</i> | nuclear factor of kappa light polypeptide gene enhancer in B-cells inhibitor, alpha |
| <i>NKX2-1</i> | NK2 homeobox 1                                                                      |
| <i>NKX3-1</i> | NK3 homeobox 1                                                                      |
| <i>NOTCH1</i> | notch 1                                                                             |
| <i>NOTCH2</i> | notch 2                                                                             |
| <i>NOTCH3</i> | notch 3                                                                             |
| <i>NOTCH4</i> | notch 4                                                                             |
| <i>NPM1</i>   | nucleophosmin (nucleolar phosphoprotein B23, numatrin)                              |
| <i>NRAS</i>   | neuroblastoma RAS viral (v-ras) oncogene homolog                                    |
| <i>NSD1</i>   | nuclear receptor binding SET domain protein 1                                       |
| <i>NTRK1</i>  | neurotrophic tyrosine kinase, receptor, type 1                                      |
| <i>NTRK2</i>  | neurotrophic tyrosine kinase, receptor, type 2                                      |



|                |                                                                                            |
|----------------|--------------------------------------------------------------------------------------------|
| <i>NTRK3</i>   | neurotrophic tyrosine kinase, receptor, type 3                                             |
| <i>NUP93</i>   | nucleoporin 93kDa                                                                          |
| <i>PAK1</i>    | p21 protein (Cdc42/Rac)-activated kinase 1                                                 |
| <i>PAK7</i>    | p21 protein (Cdc42/Rac)-activated kinase 7                                                 |
| <i>PALB2</i>   | partner and localizer of BRCA2                                                             |
| <i>PARK2</i>   | parkinson protein 2, E3 ubiquitin protein ligase (parkin)                                  |
| <i>PARP1</i>   | poly (ADP-ribose) polymerase 1                                                             |
| <i>PAX5</i>    | paired box 5                                                                               |
| <i>PBRM1</i>   | polybromo 1                                                                                |
| <i>PDCD1</i>   | programmed cell death 1                                                                    |
| <i>PDGFRA</i>  | platelet-derived growth factor receptor, alpha polypeptide                                 |
| <i>PDGFRB</i>  | platelet-derived growth factor receptor, beta polypeptide                                  |
| <i>PDPK1</i>   | 3-phosphoinositide dependent protein kinase-1                                              |
| <i>PGR</i>     | progesterone receptor                                                                      |
| <i>PHOX2B</i>  | paired-like homeobox 2b                                                                    |
| <i>PIK3C2G</i> | phosphoinositide-3-kinase, class 2, gamma polypeptide                                      |
| <i>PIK3C3</i>  | phosphoinositide-3-kinase, class 3                                                         |
| <i>PIK3CA</i>  | phosphoinositide-3-kinase, catalytic, alpha polypeptide                                    |
| <i>PIK3CB</i>  | phosphoinositide-3-kinase, catalytic, beta polypeptide                                     |
| <i>PIK3CD</i>  | phosphoinositide-3-kinase, catalytic, delta polypeptide                                    |
| <i>PIK3CG</i>  | phosphoinositide-3-kinase, catalytic, gamma polypeptide                                    |
| <i>PIK3R1</i>  | phosphoinositide-3-kinase, regulatory subunit 1 (alpha)                                    |
| <i>PIK3R2</i>  | phosphoinositide-3-kinase, regulatory subunit 2 (beta)                                     |
| <i>PIK3R3</i>  | phosphoinositide-3-kinase, regulatory subunit 3 (gamma)                                    |
| <i>PIM1</i>    | pim-1 oncogene                                                                             |
| <i>PLCG2</i>   | phospholipase C, gamma 2 (phosphatidylinositol-specific)                                   |
| <i>PLK2</i>    | polo-like kinase 2                                                                         |
| <i>PMAIP1</i>  | phorbol-12-myristate-13-acetate-induced protein 1                                          |
| <i>PMS1</i>    | PMS1 postmeiotic segregation increased 1 (S. cerevisiae)                                   |
| <i>PMS2</i>    | PMS2 postmeiotic segregation increased 2 (S. cerevisiae)                                   |
| <i>PNRC1</i>   | proline-rich nuclear receptor coactivator 1                                                |
| <i>POLD1</i>   | polymerase (DNA directed), delta 1, catalytic subunit 125kDa                               |
| <i>POLE</i>    | polymerase (DNA directed), epsilon                                                         |
| <i>PPM1D</i>   | protein phosphatase, Mg <sup>2+</sup> /Mn <sup>2+</sup> dependent, 1D                      |
| <i>PPP2RIA</i> | protein phosphatase 2, regulatory subunit A, alpha                                         |
| <i>PPP6C</i>   | protein phosphatase 6, catalytic subunit                                                   |
| <i>PRDM1</i>   | PR domain containing 1, with ZNF domain                                                    |
| <i>PRKARIA</i> | protein kinase, cAMP-dependent, regulatory, type I, alpha (tissue specific extinguisher 1) |
| <i>PTCH1</i>   | patched 1                                                                                  |

|                |                                                                                         |
|----------------|-----------------------------------------------------------------------------------------|
| <i>PTEN</i>    | phosphatase and tensin homolog                                                          |
| <i>PTPN11</i>  | protein tyrosine phosphatase, non-receptor type 11                                      |
| <i>PTPRD</i>   | protein tyrosine phosphatase, receptor type, D                                          |
| <i>PTPRS</i>   | protein tyrosine phosphatase, receptor type, S                                          |
| <i>PTPRT</i>   | protein tyrosine phosphatase, receptor type, T                                          |
| <i>RAB35</i>   | RAB35, member RAS oncogene family                                                       |
| <i>RAC1</i>    | ras-related C3 botulinum toxin substrate 1 (rho family, small GTP binding protein Rac1) |
| <i>RAD21</i>   | RAD21 homolog (S. pombe)                                                                |
| <i>RAD50</i>   | RAD50 homolog (S. cerevisiae)                                                           |
| <i>RAD51</i>   | RAD51 homolog (RecA homolog, E. coli) (S. cerevisiae)                                   |
| <i>RAD51C</i>  | RAD51 homolog C (S. cerevisiae)                                                         |
| <i>RAD51L1</i> | RAD51-like 1 (S. cerevisiae)                                                            |
| <i>RAD51L3</i> | RAD51-like 3 (S. cerevisiae)                                                            |
| <i>RAD52</i>   | RAD52 homolog (S. cerevisiae)                                                           |
| <i>RAD54L</i>  | RAD54-like (S. cerevisiae)                                                              |
| <i>RAF1</i>    | v-raf-1 murine leukemia viral oncogene homolog 1                                        |
| <i>RARA</i>    | retinoic acid receptor, alpha                                                           |
| <i>RASA1</i>   | RAS p21 protein activator (GTPase activating protein) 1                                 |
| <i>RB1</i>     | retinoblastoma 1                                                                        |
| <i>RBM10</i>   | RNA binding motif protein 10                                                            |
| <i>RECQL4</i>  | RecQ protein-like 4                                                                     |
| <i>REL</i>     | v-rel reticuloendotheliosis viral oncogene homolog (avian)                              |
| <i>RET</i>     | ret proto-oncogene                                                                      |
| <i>RFWD2</i>   | ring finger and WD repeat domain 2                                                      |
| <i>RHEB</i>    | Ras homolog enriched in brain                                                           |
| <i>RHOA</i>    | ras homolog gene family, member A                                                       |
| <i>RICTOR</i>  | RPTOR independent companion of MTOR, complex 2                                          |
| <i>RIT1</i>    | Ras-like without CAAX 1                                                                 |
| <i>RNF43</i>   | ring finger protein 43                                                                  |
| <i>ROS1</i>    | c-ros oncogene 1 , receptor tyrosine kinase                                             |
| <i>RPS6KA4</i> | ribosomal protein S6 kinase, 90kDa, polypeptide 4                                       |
| <i>RPS6KB2</i> | ribosomal protein S6 kinase, 70kDa, polypeptide 2                                       |
| <i>RPTOR</i>   | regulatory associated protein of MTOR, complex 1                                        |
| <i>RUNX1</i>   | runt-related transcription factor 1                                                     |
| <i>RYBP</i>    | RING1 and YY1 binding protein                                                           |
| <i>SDHA</i>    | succinate dehydrogenase complex, subunit A, flavoprotein (Fp)                           |
| <i>SDHAF2</i>  | succinate dehydrogenase complex assembly factor 2                                       |
| <i>SDHB</i>    | succinate dehydrogenase complex, subunit B, iron sulfur (Ip)                            |
| <i>SDHC</i>    | succinate dehydrogenase complex, subunit C, integral membrane protein, 15kDa            |

|                |                                                                                                   |
|----------------|---------------------------------------------------------------------------------------------------|
| <i>SDHD</i>    | succinate dehydrogenase complex, subunit D, integral membrane protein                             |
| <i>SETD2</i>   | SET domain containing 2                                                                           |
| <i>SF3B1</i>   | splicing factor 3b, subunit 1, 155kDa                                                             |
| <i>SH2B3</i>   | SH2B adaptor protein 3                                                                            |
| <i>SH2D1A</i>  | SH2 domain containing 1A                                                                          |
| <i>SHQ1</i>    | SHQ1 homolog ( <i>S. cerevisiae</i> )                                                             |
| <i>SMAD2</i>   | SMAD family member 2                                                                              |
| <i>SMAD3</i>   | SMAD family member 3                                                                              |
| <i>SMAD4</i>   | SMAD family member 4                                                                              |
| <i>SMARCA4</i> | SWI/SNF related, matrix associated, actin dependent regulator of chromatin, subfamily a, member 4 |
| <i>SMARCB1</i> | SWI/SNF related, matrix associated, actin dependent regulator of chromatin, subfamily b, member 1 |
| <i>SMARCD1</i> | SWI/SNF related, matrix associated, actin dependent regulator of chromatin, subfamily d, member 1 |
| <i>SMO</i>     | smoothed homolog ( <i>Drosophila</i> )                                                            |
| <i>SOCS1</i>   | suppressor of cytokine signaling 1                                                                |
| <i>SOX17</i>   | SRY (sex determining region Y)-box 17                                                             |
| <i>SOX2</i>    | SRY (sex determining region Y)-box 2                                                              |
| <i>SOX9</i>    | SRY (sex determining region Y)-box 9                                                              |
| <i>SPEN</i>    | spen homolog, transcriptional regulator ( <i>Drosophila</i> )                                     |
| <i>SPOP</i>    | speckle-type POZ protein                                                                          |
| <i>SRC</i>     | v-src sarcoma (Schmidt-Ruppin A-2) viral oncogene homolog (avian)                                 |
| <i>SRSF2</i>   | serine/arginine-rich splicing factor 2                                                            |
| <i>STAG2</i>   | stromal antigen 2                                                                                 |
| <i>STAT3</i>   | signal transducer and activator of transcription 3 (acute-phase response factor)                  |
| <i>STAT5A</i>  | signal transducer and activator of transcription 5A                                               |
| <i>STAT5B</i>  | signal transducer and activator of transcription 5B                                               |
| <i>STK11</i>   | serine/threonine kinase 11                                                                        |
| <i>STK40</i>   | serine/threonine kinase 40                                                                        |
| <i>SUFU</i>    | suppressor of fused homolog ( <i>Drosophila</i> )                                                 |
| <i>SUZ12</i>   | suppressor of zeste 12 homolog ( <i>Drosophila</i> )                                              |
| <i>SYK</i>     | spleen tyrosine kinase                                                                            |
| <i>TBX3</i>    | T-box 3                                                                                           |
| <i>TCEB1</i>   | transcription elongation factor B (SIII), polypeptide 1 (15kDa, elongin C)                        |
| <i>TCF3</i>    | transcription factor 3 (E2A immunoglobulin enhancer binding factors E12/E47)                      |
| <i>TCF7L2</i>  | transcription factor 7-like 2 (T-cell specific, HMG-box)                                          |
| <i>TERT</i>    | telomerase reverse transcriptase                                                                  |
| <i>TET1</i>    | tet oncogene 1                                                                                    |
| <i>TET2</i>    | tet oncogene family member 2                                                                      |
| <i>TGFBR1</i>  | transforming growth factor, beta receptor 1                                                       |

|                 |                                                                                    |
|-----------------|------------------------------------------------------------------------------------|
| <i>TGFBR2</i>   | transforming growth factor, beta receptor II (70/80kDa)                            |
| <i>TMEM127</i>  | transmembrane protein 127                                                          |
| <i>TMPRSS2</i>  | transmembrane protease, serine 2                                                   |
| <i>TNFAIP3</i>  | tumor necrosis factor, alpha-induced protein 3                                     |
| <i>TNFRSF14</i> | tumor necrosis factor receptor superfamily, member 14 (herpesvirus entry mediator) |
| <i>TOP1</i>     | topoisomerase (DNA) I                                                              |
| <i>TP53</i>     | tumor protein p53                                                                  |
| <i>TP63</i>     | tumor protein p63                                                                  |
| <i>TRAF2</i>    | TNF receptor-associated factor 2                                                   |
| <i>TRAF7</i>    | TNF receptor-associated factor 7                                                   |
| <i>TSC1</i>     | tuberous sclerosis 1                                                               |
| <i>TSC2</i>     | tuberous sclerosis 2                                                               |
| <i>TSHR</i>     | thyroid stimulating hormone receptor                                               |
| <i>U2AF1</i>    | U2 small nuclear RNA auxiliary factor 1                                            |
| <i>VEGFA</i>    | vascular endothelial growth factor A                                               |
| <i>VHL</i>      | von Hippel-Lindau tumor suppressor                                                 |
| <i>VTGN1</i>    | V-set domain containing T cell activation inhibitor 1                              |
| <i>WT1</i>      | Wilms tumor 1                                                                      |
| <i>XIAP</i>     | X-linked inhibitor of apoptosis                                                    |
| <i>XPO1</i>     | exportin 1 (CRM1 homolog, yeast)                                                   |
| <i>XRCC2</i>    | X-ray repair complementing defective repair in Chinese hamster cells 2             |
| <i>YAP1</i>     | Yes-associated protein 1                                                           |
| <i>YES1</i>     | v-yes-1 Yamaguchi sarcoma viral oncogene homolog 1                                 |
| <i>ZFH3</i>     | zinc finger homeobox 3                                                             |
| <i>ZRSR2</i>    | zinc finger (CCCH type), RNA-binding motif and serine/arginine rich 2              |
