# Supplementary material
Source: PubMed Central journal article supplement (PMC5482929)
Supplement: NIHMS863885-supplement-3.pdf [file NIHMS863885-supplement-3.pdf]

Supplementary Figure S2: Patient 1 Concurrent *EGFR* and *KRAS* mutations in a patient identified by MSK-IMPACT

**Patient 1**

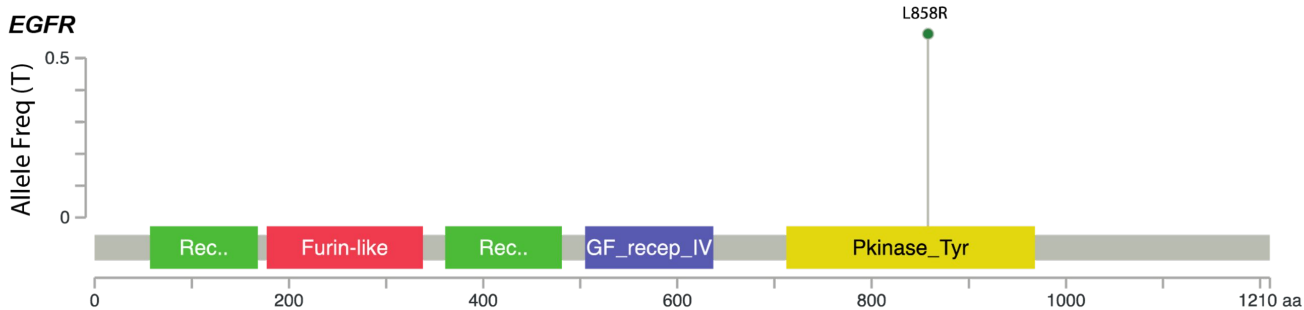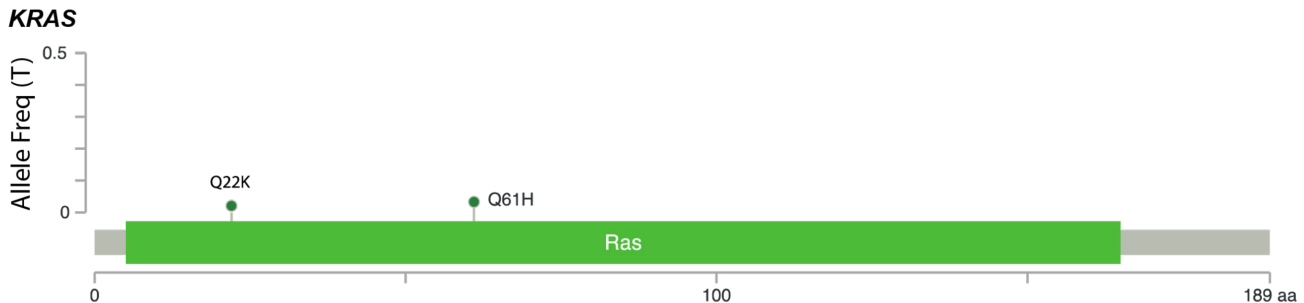

| Patient 1          | Allele Frequency | Cytoband |
|--------------------|------------------|----------|
| <i>EGFR</i> L858R  | 0.59             | 7p11.2   |
| <i>KRAS</i> Q61H   | 0.04             | 12p12.1  |
| <i>KRAS</i> Q22K   | 0.03             | 12p12.1  |
| <i>TP53</i> Y163C  | 0.25             | 17p13.1  |
| <i>PTPRT</i> P193S | 0.12             | 20q12    |
| <i>EGFR</i>        | AMP              | 7p12     |
