# Supplementary material
Source: PubMed Central journal article supplement (PMC5482929)
Supplement: NIHMS863885-supplement-4.pdf [file NIHMS863885-supplement-4.pdf]

Supplementary Figure S3: Patient 2 Concurrent *EGFR* and *KRAS* mutations in a patient identified by MSK-IMPACT

Patient 2

*EGFR*

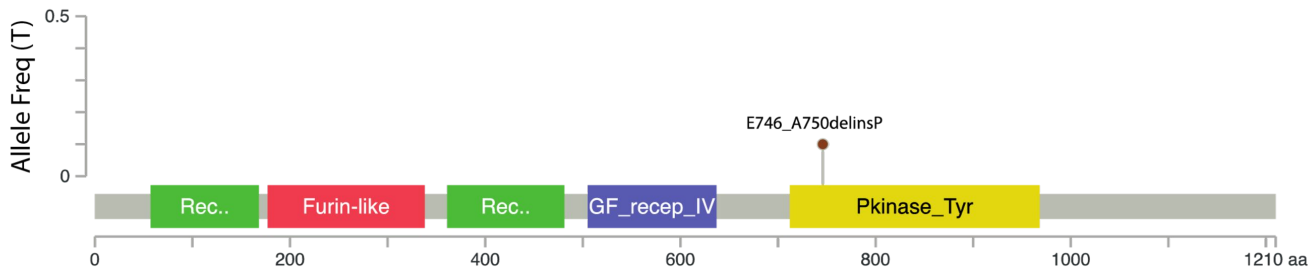

*KRAS*

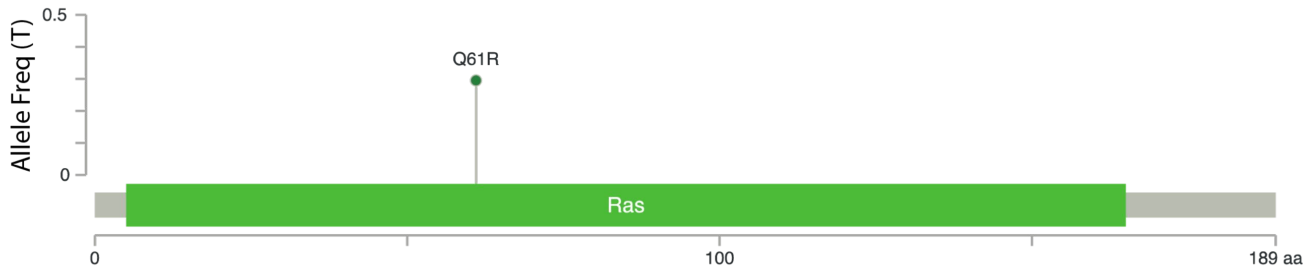

| Patient 2            | Allele Frequency | Cytoband      |
|----------------------|------------------|---------------|
| <i>EGFR</i>          | 0.12             | 7p11.2        |
| <i>KRAS</i> Q61R     | 0.35             | 12p12.1       |
| <i>PPP2RIA</i> R183Q | 0.37             | 19q13.3       |
| <i>MTOR</i> T1977K   | 0.24             | 1p36.22       |
| <i>KMT2D</i> R2188H  | 0.27             | 12q13.12      |
| <i>CDK4</i>          | AMP              | 12q14         |
| <i>MDM2</i>          | AMP              | 12q14.3-q15   |
| <i>RICTOR</i>        | AMP              | 5p13.1        |
| <i>GLII</i>          | AMP              | 12q13.2-q13.3 |
| <i>TERT</i>          | AMP              | 5p15.33       |
| <i>SDHA</i>          | AMP              | 5p15          |
| <i>IL7R</i>          | AMP              | 5p13          |
| <i>RASA1</i>         | AMP              | 5q13.3        |
