# Supplementary material
Source: PubMed Central journal article supplement (PMC5482929)
Supplement: NIHMS863885-supplement-7.pdf [file NIHMS863885-supplement-7.pdf]

Supplementary Figure S6: Types of Clinical trials patients enrolled to according to level 1-4 and UMD assigned samples

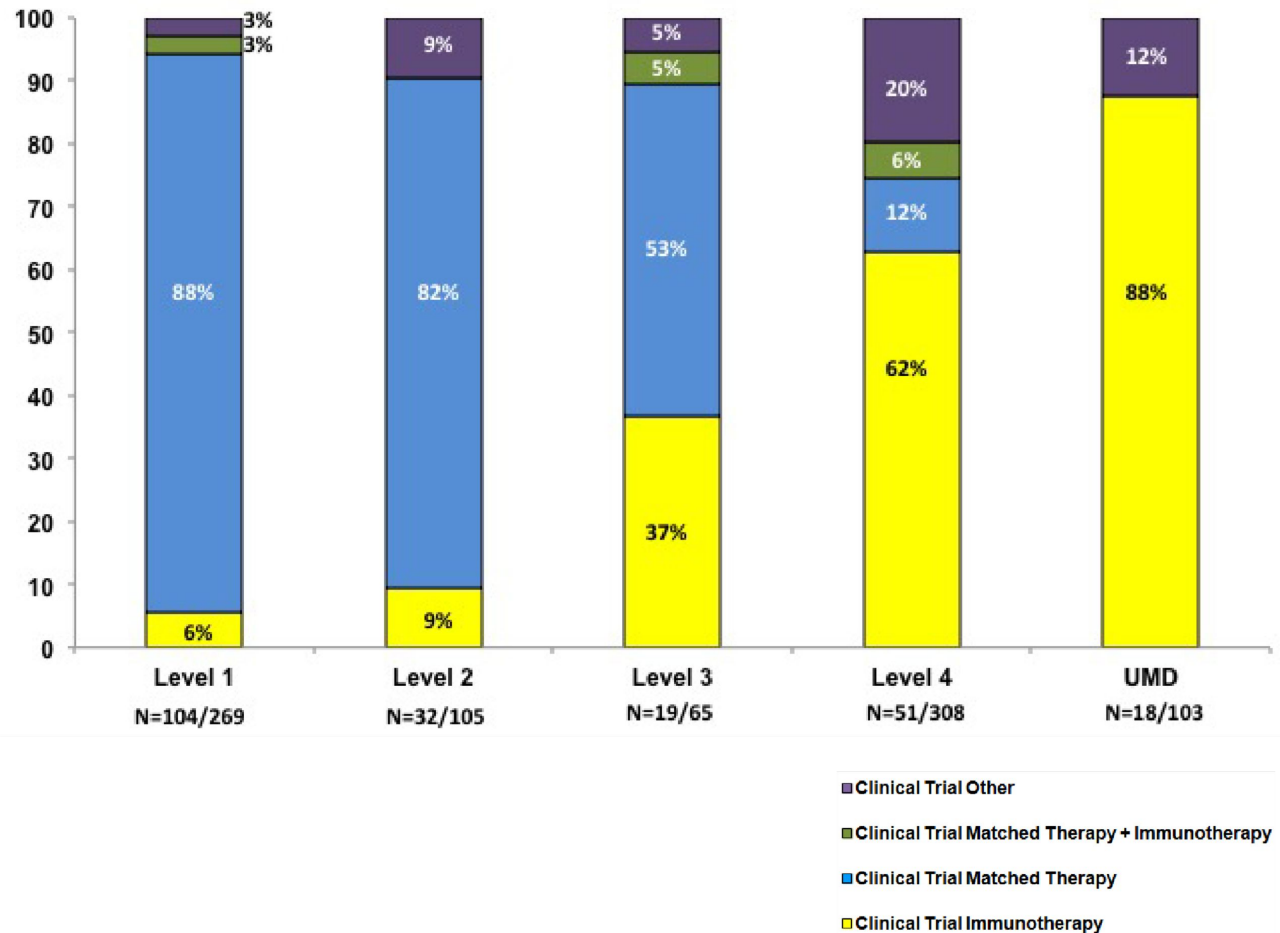

\*Ten patients had no mutations due to low purity
