# Supplementary material
Source: PubMed Central journal article supplement (PMC5482929)

Supplementary Figure S7: Median number of mutations in samples sequenced by MSK-IMPACT in patients with a level 1-4 alteration or assigned to the unknown mitogenic driver cohort

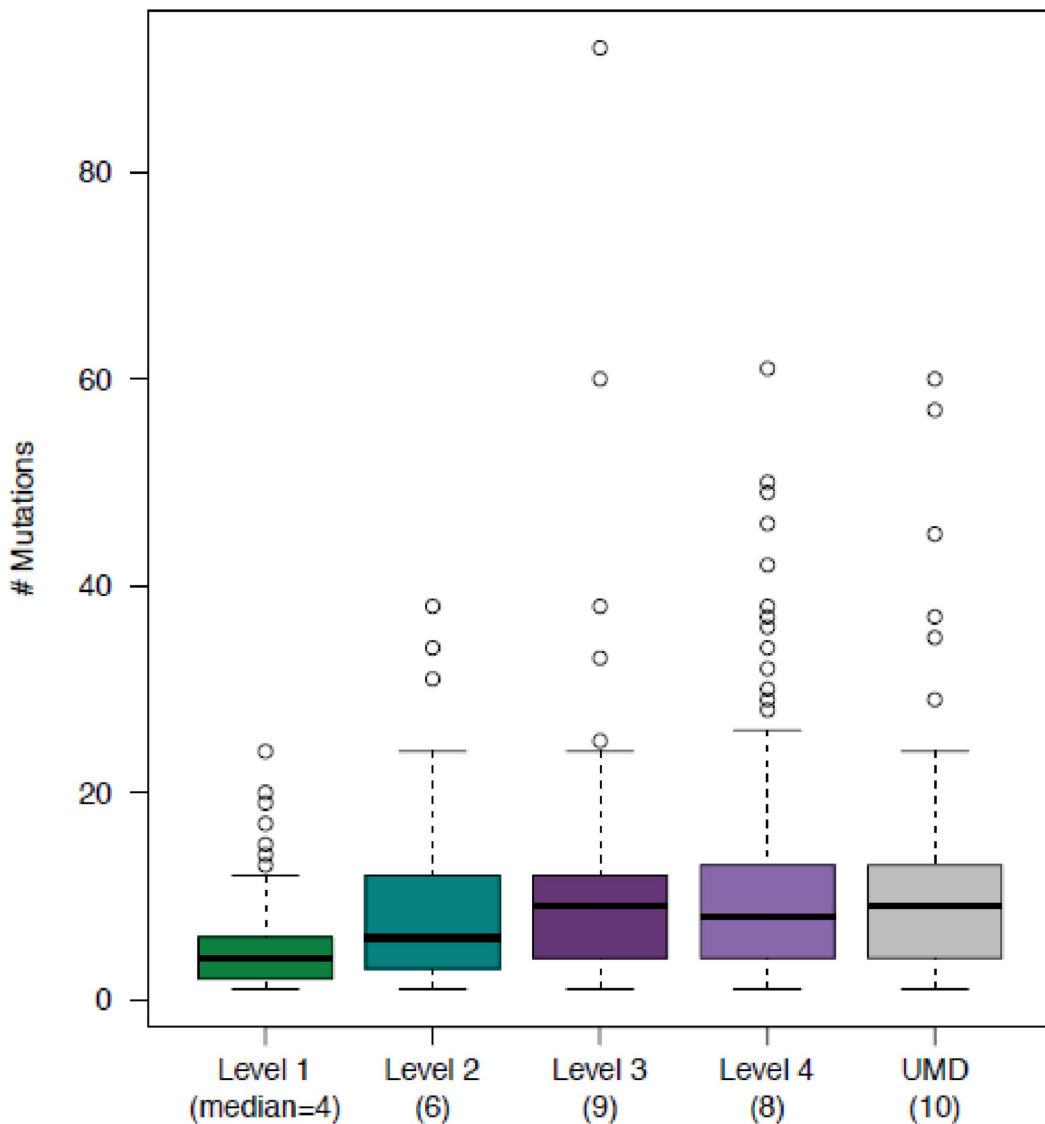

Supplement: NIHMS863885-supplement-8.pdf [file NIHMS863885-supplement-8.pdf]
