# Supplementary material
Source: PubMed Central journal article supplement (PMC5482929)

Supplementary Figure S1: Co-occurring Level 1-3 alterations by MSK-IMPACT in 52 patients

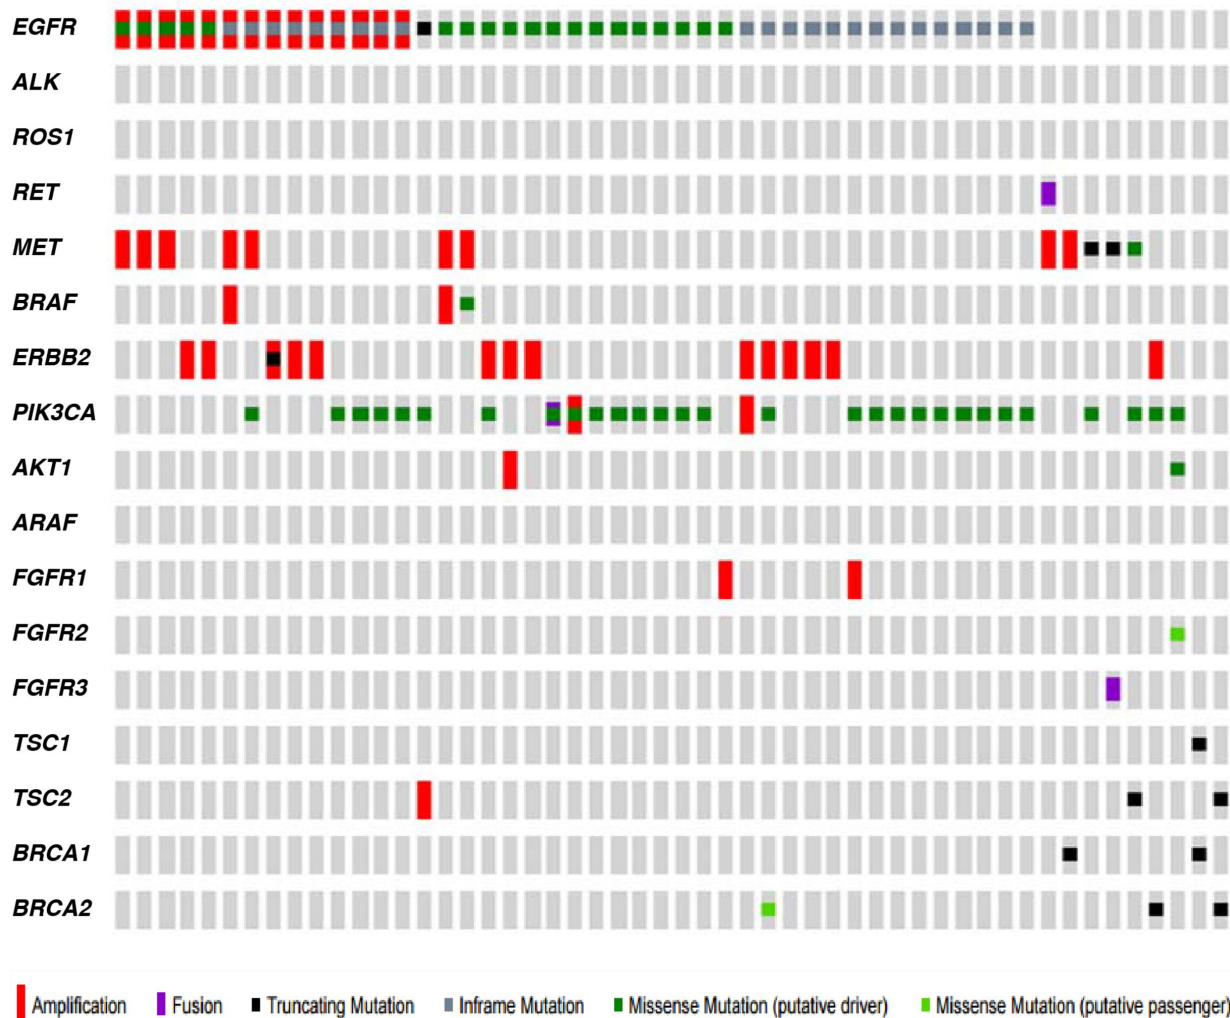

Supplement: NIHMS863885-supplement-2.pdf [file NIHMS863885-supplement-2.pdf]

Supplementary Figure S4: Breakdown of *RET* and *ROS1* fusion positive patients

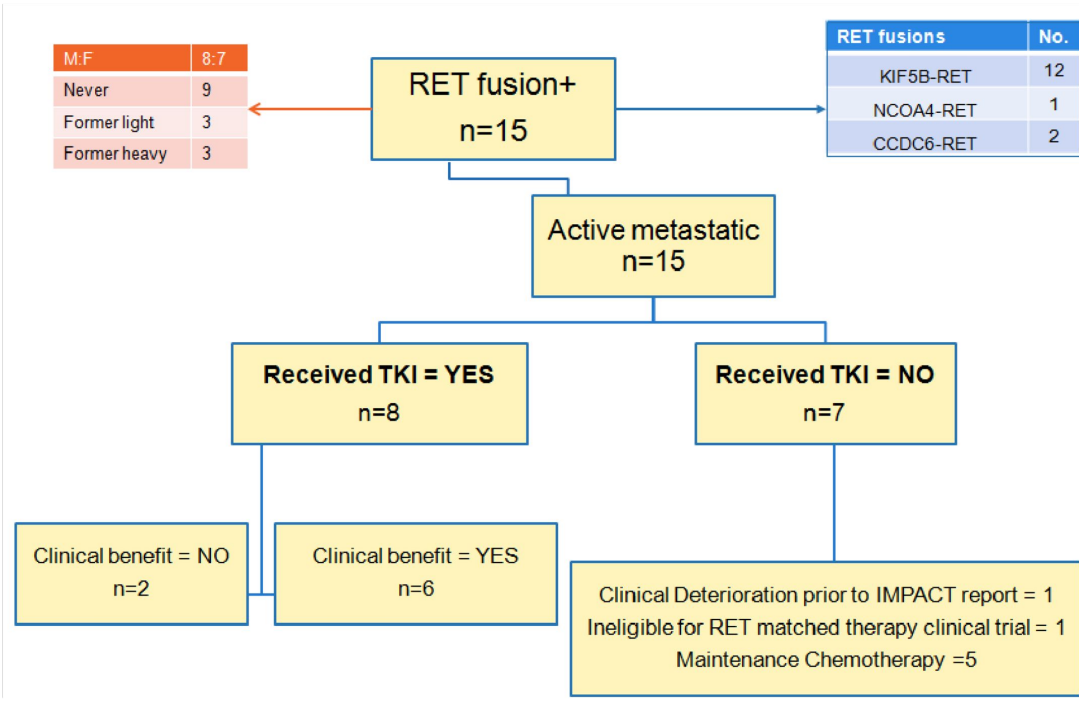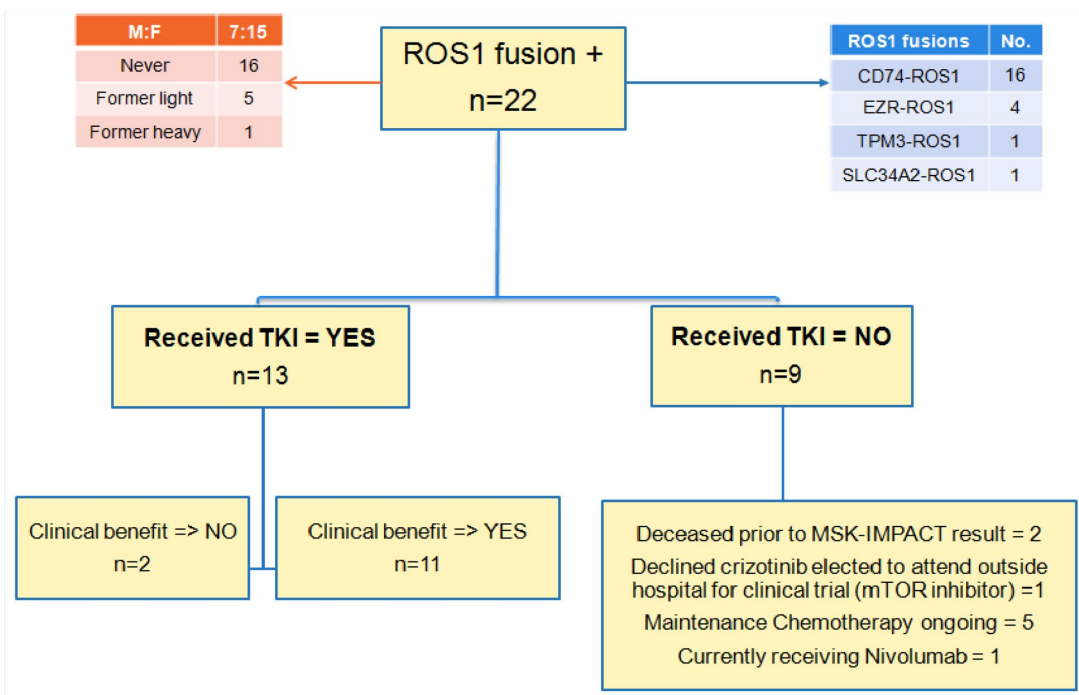

Supplement: NIHMS863885-supplement-5.pdf [file NIHMS863885-supplement-5.pdf]

A

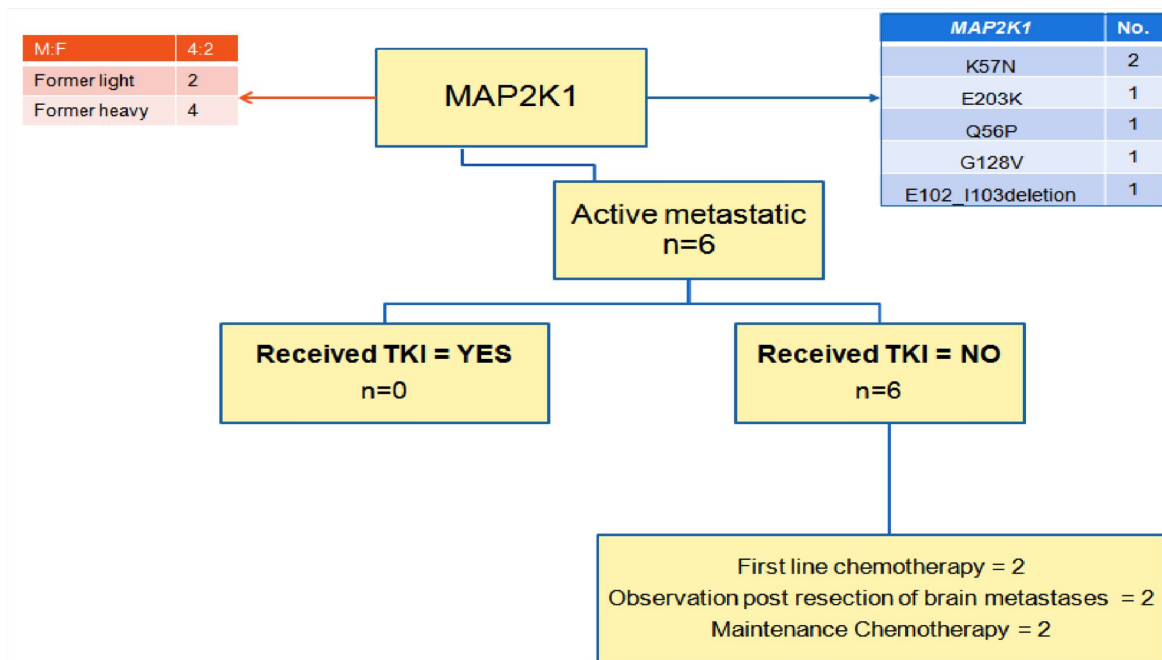

B

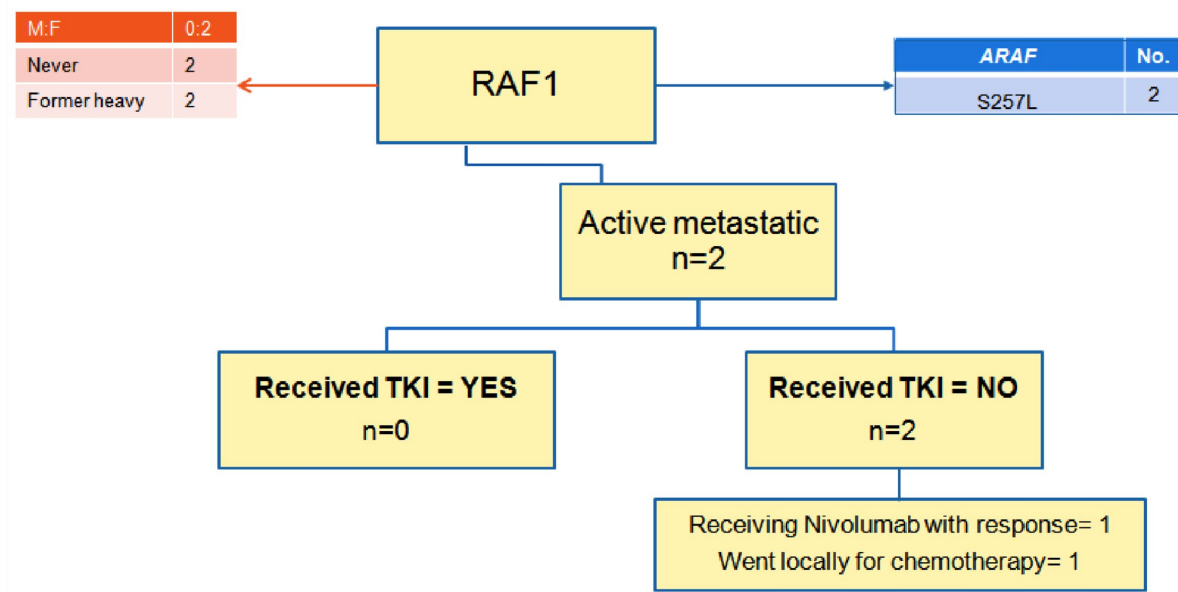

C

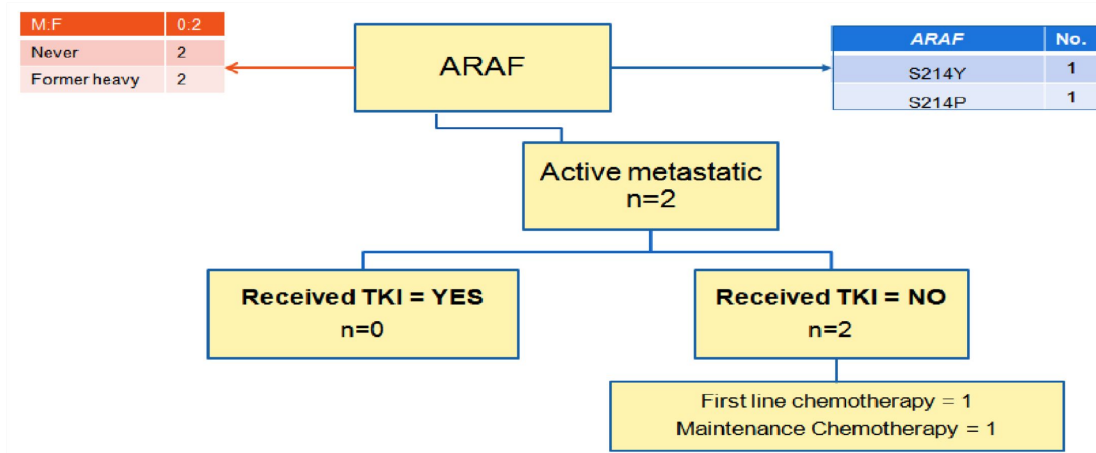

D

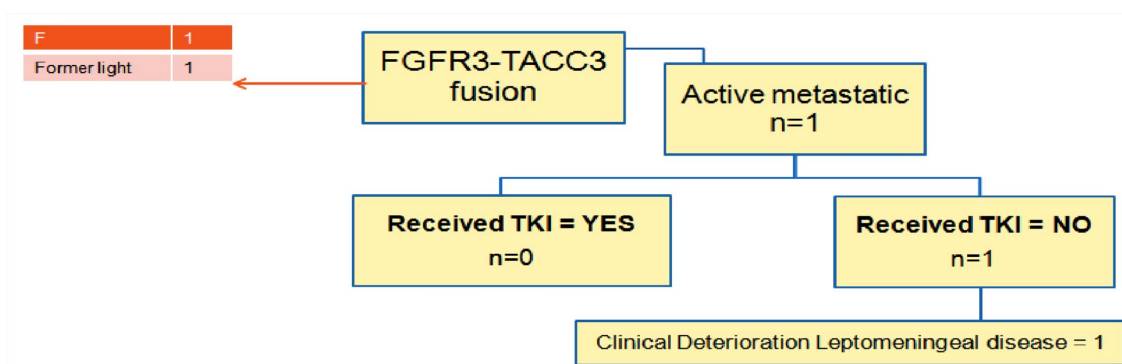

E

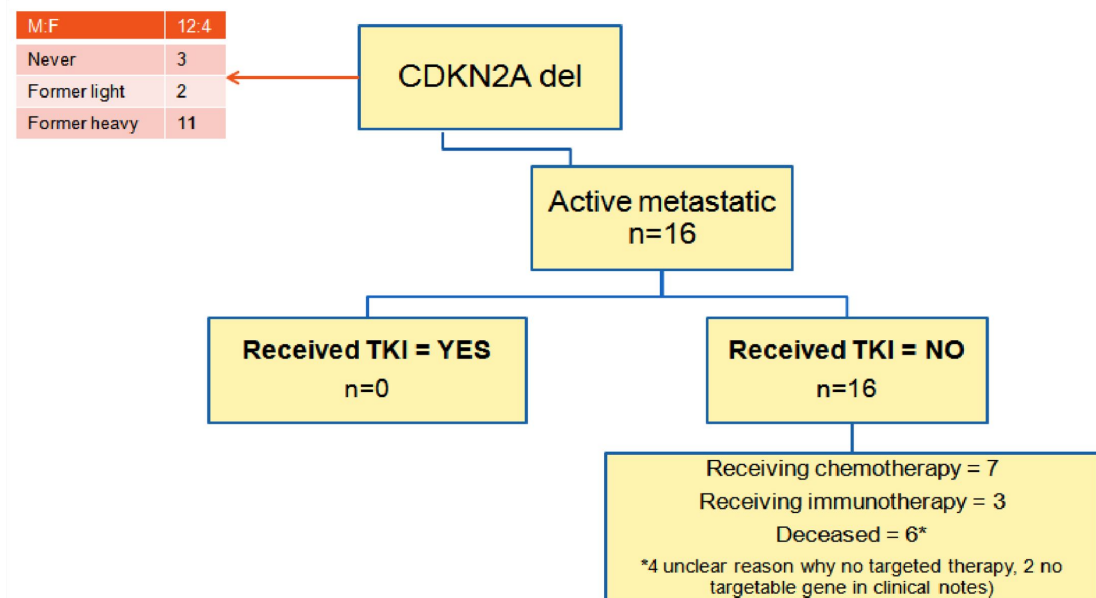

Supplement: NIHMS863885-supplement-6.pdf [file NIHMS863885-supplement-6.pdf]
